# Supplementary material
Source: MDPI journal article supplement (https://www.mdpi.com/2624-8549/5/3/108)
Supplement: s1 [file s1]

## *Supplementary Information*

### **Coupling 2-Aminopurine with DNA Copper Nanoparticles as A Rapid and Enzyme-free System for Operating DNA Contrary Logic Pairs**

Jun Wang,<sup>a†</sup> Jiawen Han,<sup>a†</sup> Xujuan Lv,<sup>a</sup> Jingyu Hou,<sup>a</sup> Daoqing Fan<sup>\*ab</sup>, Shaojun Dong<sup>\*b</sup>

<sup>a</sup> Laboratory for Marine Drugs and Bioproducts, National Laboratory for Marine Science and Technology; Key Laboratory of Marine Drugs, Ministry of Education, School of Medicine and Pharmacy, Ocean University of China; Qingdao, Shandong, 266003, China.

<sup>b</sup> State Key Laboratory of Electroanalytical Chemistry, Changchun Institute of Applied Chemistry, Chinese Academy of Sciences, Changchun, 130022, China.

<sup>†</sup> These authors contributed equally to this work.

**Table S1** Sequences of DNA strands used in this work.

| Name    | Sequence (5'-3')                                                   |
|---------|--------------------------------------------------------------------|
| 2AP-T20 | GCATCTAATT <sub>A<sub>p</sub></sub> TTCCTCTTCCTTTTTTTTTTTTTTTTTTTT |
| A20-C1  | AAAAAAAAAAAAAAAAAAAAAGGAAGAGGAAAATTAGATGC                          |
| A22-C1  | AAAAAAAAAAAAAAAAAAAAAGGAAGAGGAAAATTAGATGC                          |
| T30-2AP | TTTTTTTTTTTTTTTT <sub>A<sub>p</sub></sub> TTTTTTTTTTTTTTTTT        |
| A20     | AAAAAAAAAAAAAAAAAAAAA                                              |
| A25     | AAAAAAAAAAAAAAAAAAAAA                                              |
| A40     | AAAAAAAAAAAAAAAAAAAAA                                              |
| A25-C   | AAAAAAAAAAAAAAAAAAAAAC                                             |
| A25-G   | AAAAAAAAAAAAAAAAAAAAAG                                             |
| A25-T   | AAAAAAAAAAAAAAAAAAAAAT                                             |

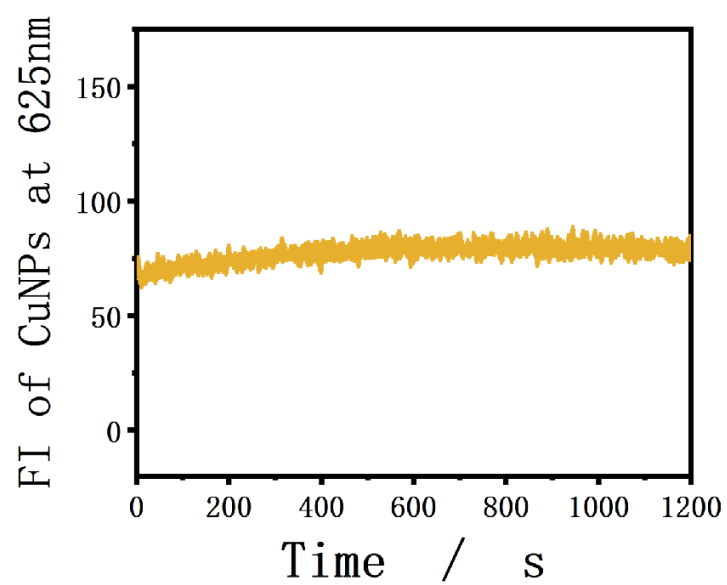

**Figure S1.** Fluorescence kinetics of CuNPs after adding 300 nM A20-C1 to the solution of 250 nM 2AP-T20 strand.

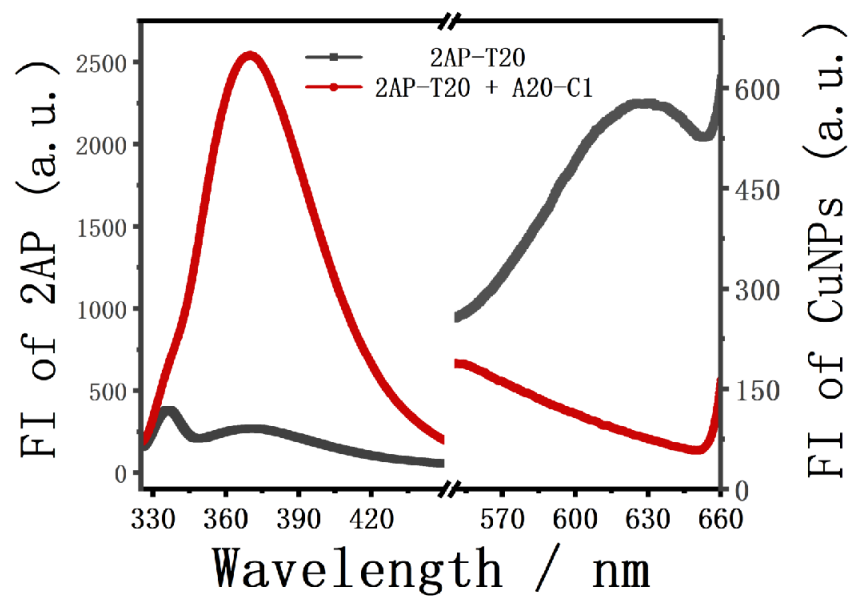

**Figure S2.** Fluorescence spectra of YES/NOT logic gate under different inputs.

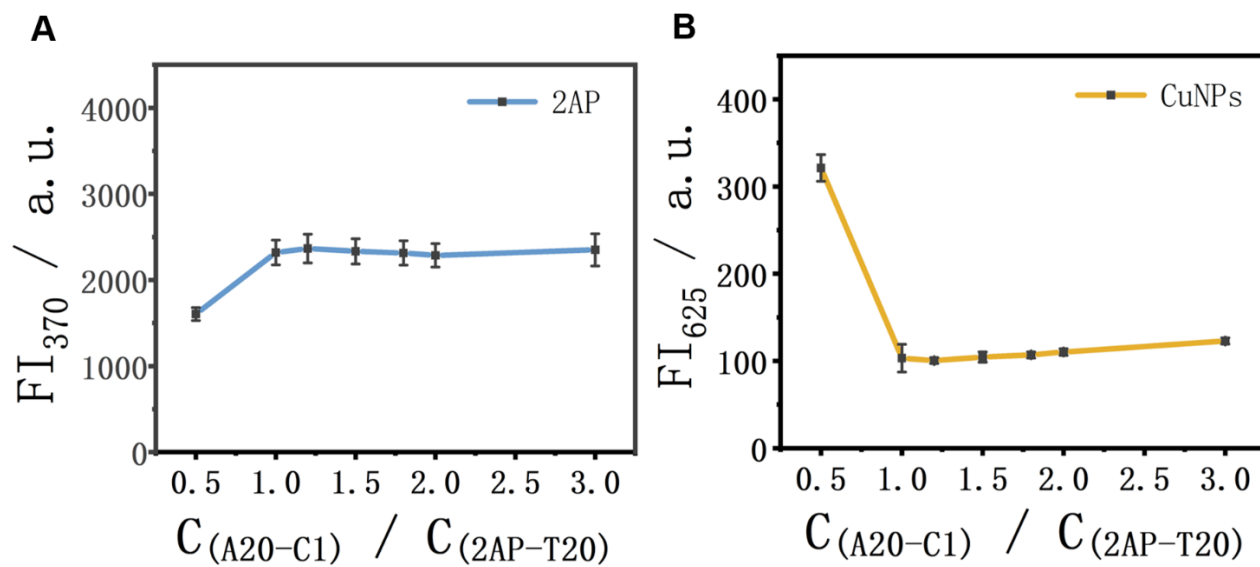

**Figure S3.** (A) Optimization of the concentration of A20-C1 used in D-CLPs via recording the fluorescence signal of 2AP. (B) Optimization of the concentration of A20-C1 used in D-CLPs via recording the fluorescence intensity of 2AP-T20-templated CuNPs.

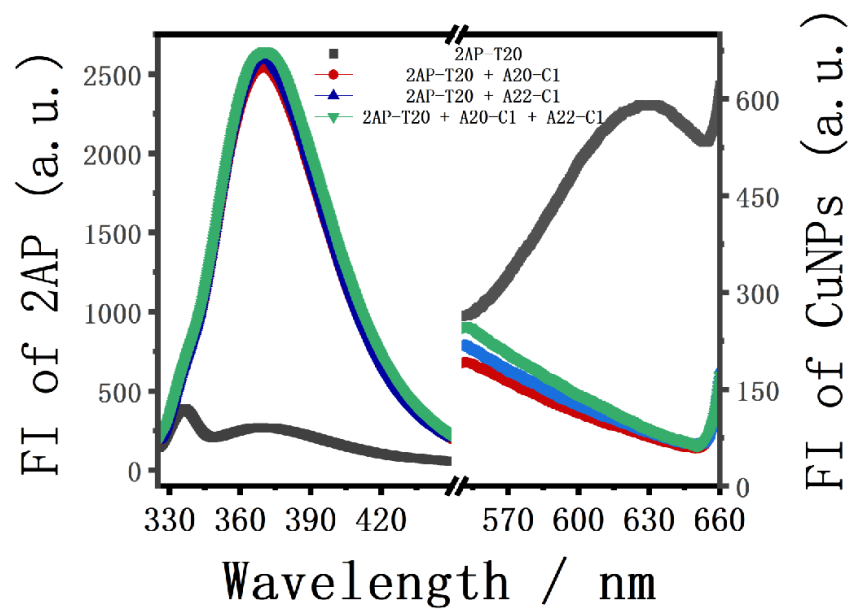

**Figure S4.** Fluorescence spectra of OR/NOR logic gate under different inputs.

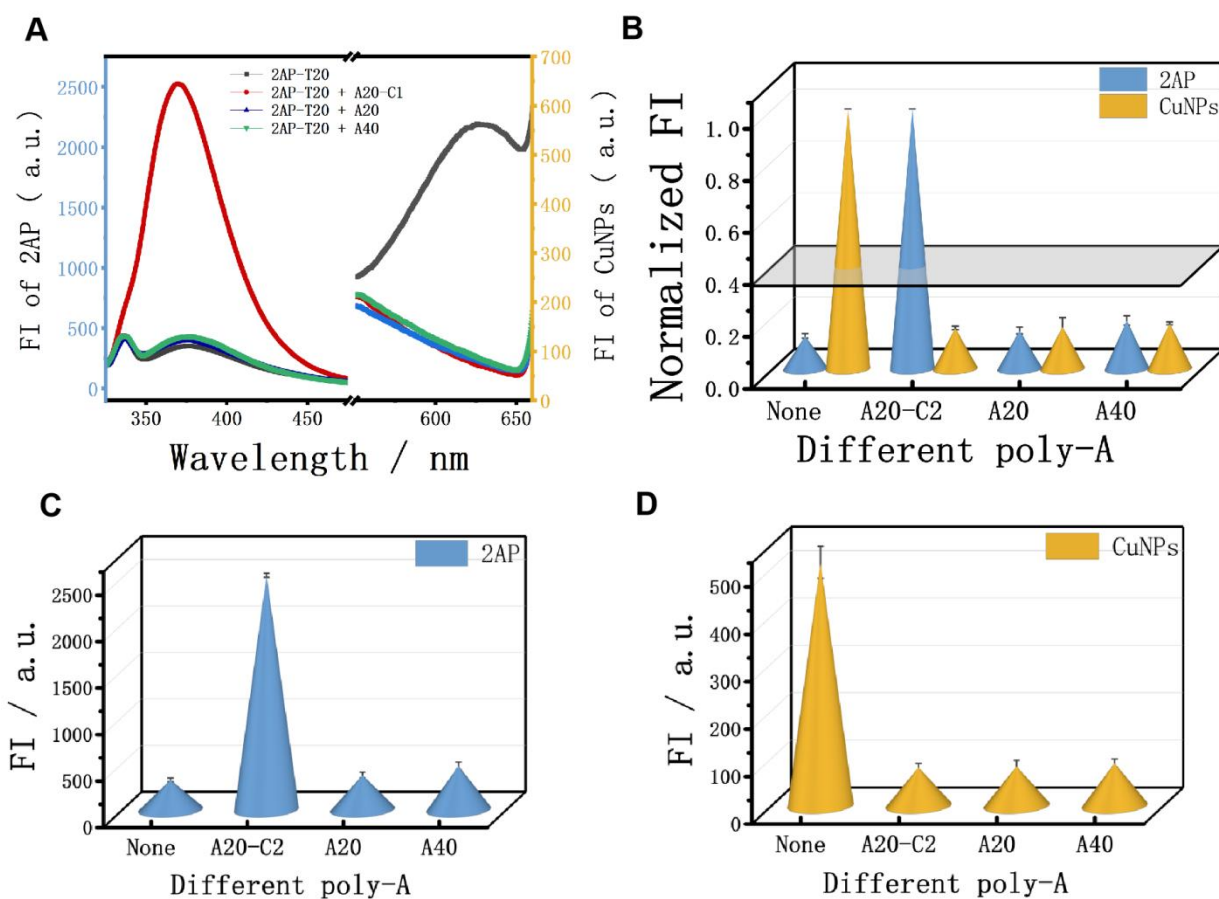

**Figure S5.** The different poly-A are set as control sequences to demonstrate the specific response of 2AP-T20 system. (A) Fluorescence spectra of 2AP and CuNPs with different poly-A. (B) Normalized fluorescent column bars of the 2AP (blue) and CuNPs (yellow) with different poly-A. (C) Fluorescence intensity column bars of 2AP in the presence of different poly-A. (D) Fluorescence intensity column bars of CuNPs in the presence of different poly-A.

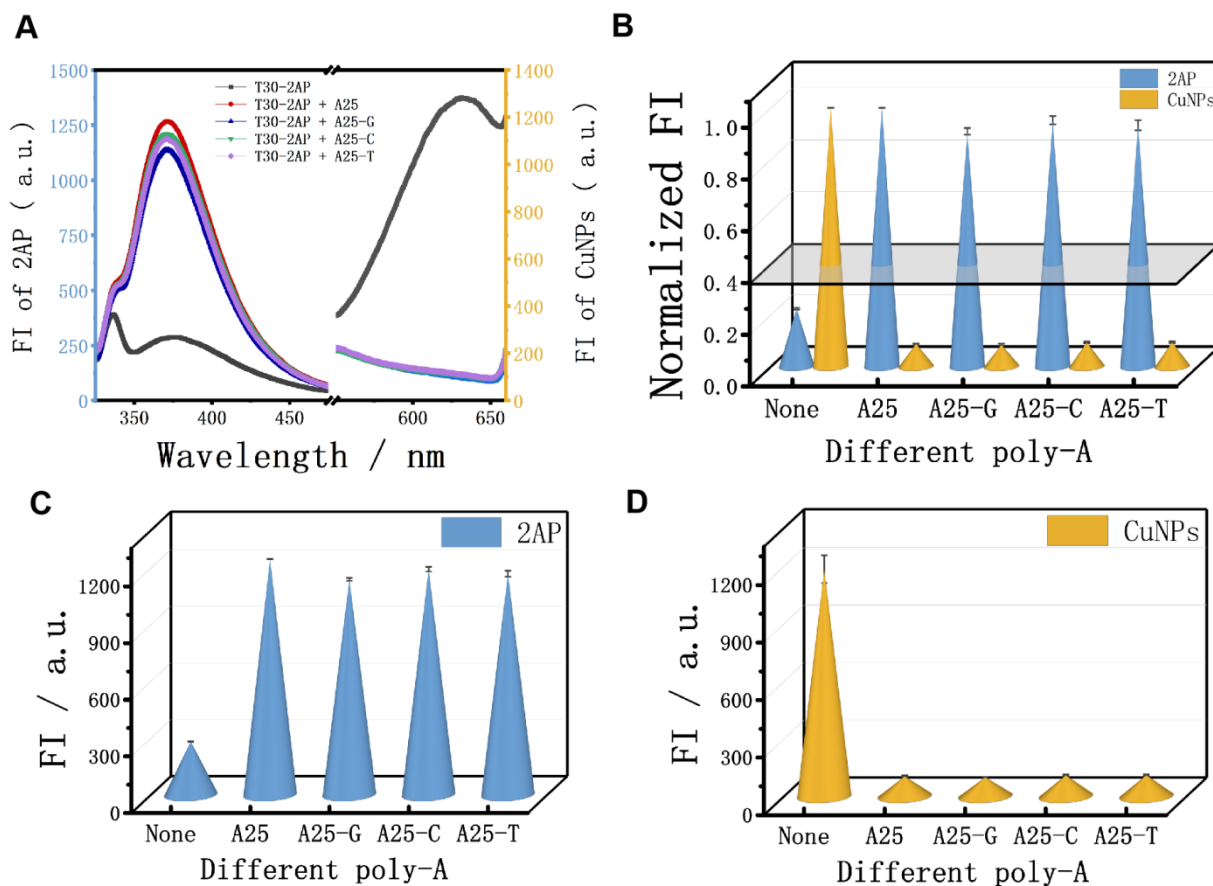

**Figure S6.** Different single bases are inserted into the poly-A tail to clarify the T30-2AP system's specificity. (A) Fluorescence spectra of 2AP and CuNPs with different poly-A. (B) Normalized fluorescent column bars of the 2AP (blue) and CuNPs (yellow) with different poly-A. (C) Fluorescence intensity column bars of 2AP in the presence of different poly-A. (D) Fluorescence intensity column bars of CuNPs in the presence of different poly-A.
